# Supplementary material for: IMPACT is a GCN2 inhibitor that limits lifespan in Caenorhabditis elegans
Source: PubMed Central journal article supplement (PMC5054600; doi:10.1186/s12915-016-0301-2), 2016-10-07
Supplement: 12915_2016_301_MOESM1_ESM.pdf [file 12915_2016_301_MOESM1_ESM.pdf]

**a**

Range 1: 6 to 293 [GenPept](#) [Graphics](#)

▼ Next Match ▲ Previous Match

| Score         | Expect                                                       | Method                       | Identities  | Positives    | Gaps        |
|---------------|--------------------------------------------------------------|------------------------------|-------------|--------------|-------------|
| 167 bits(422) | 7e-55                                                        | Compositional matrix adjust. | 95/291(33%) | 150/291(51%) | 42/291(14%) |
| Query 1       | MSDEEQRIAEIESLASIFPDLLLEETTDKQLVFKF-----DRDIGMTINLPEDYPSI    |                              |             |              | 51          |
|               | + + +++ EIE++A+I+ + + +F + + + LP +YP                        |                              |             |              |             |
| Sbjct 6       | VGNSQRQSEEIEAMAAIYGEEWCVIDENAKIFCIRVTDFMDDPKWTLCLQVMLPSEYPGT |                              |             |              | 65          |
| Query 52      | SPPIFELSGPYLRREQEVLHNSLNDVYIENIGFPVIFNWISLVQDFIRDLP EEVAEP-- |                              |             |              | 109         |
|               | +PP ++L+ P+L+ +++ L NSL ++Y+ N+G +++ W+ ++D + ++ EP          |                              |             |              |             |
| Sbjct 66      | APPSYQLNAPWLKQGERADLSNSLEEIYVHNMGESILYQWVEKIRDALIQ-KSQITEPDP |                              |             |              | 124         |
| Query 110     | -----SHVADDVVTPMAEEIDDMN-----IRHGEVLTDRKSA                   |                              |             |              | 141         |
|               | H ++ V + +I + + HG +TDR+S                                    |                              |             |              |             |
| Sbjct 125     | DVKKKTEEVEVESEEDPILEHPPENPVKTLDLKISEETQPETEELPPVAHGVPITDRRST |                              |             |              | 184         |
| Query 142     | FQAHLAEVRSKEDVDRVMRILKSNTKICRATHNITAYRYMTEINGKPIHHHDCVDDGEFG |                              |             |              | 201         |
|               | FQAH+A V E V V+ L N KI ATHNI AYR E K DC DDGE                 |                              |             |              |             |
| Sbjct 185     | FQAHVAPVVCPEQVKLVLAKLYENKKIASATHNIYAYRIFCE--DKQTFLQDCEDDGETA |                              |             |              | 242         |
| Query 202     | ASSKMLELMDRMKADNMVVVSRWYGGIHLGPDRFRHINNLTROILSDNNY           |                              |             |              | 252         |
|               | A ++L LM+ + NVMVVVSRWYGGI LGPDRF+HINN R IL + N+              |                              |             |              |             |
| Sbjct 243     | AGGRLHLHMEILNVKNMVVVSRWYGGILLGPDRFKHINNCARNILVEKNF           |                              |             |              | 293         |

**b**

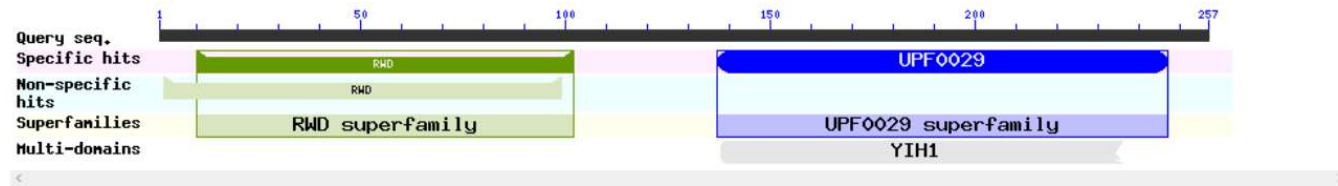

| Name        | Accession  | Description                                                                                         | Interval | E-value  |
|-------------|------------|-----------------------------------------------------------------------------------------------------|----------|----------|
| [+] UPF0029 | pfam01205  | Uncharacterized protein family UPF0029;                                                             | 137-247  | 6.42e-36 |
| [+] RWD     | smart00591 | domain in RING finger and WD repeat containing proteins and DEXDc-like helicases subfamily ...      | 10-102   | 7.62e-21 |
| [+] RWD     | pfam05773  | RWD domain; This domain was identified in WD40 repeat proteins and Ring finger domain proteins. ... | 2-99     | 7.88e-18 |
| [+] YIH1    | COG1739    | Putative translation regulator, IMPACT (imprinted ancient) protein family [General function ...     | 138-236  | 2.08e-07 |
