# Supplementary material for: IMPACT is a GCN2 inhibitor that limits lifespan in Caenorhabditis elegans
Source: PubMed Central journal article supplement (PMC5054600; doi:10.1186/s12915-016-0301-2), 2016-10-07

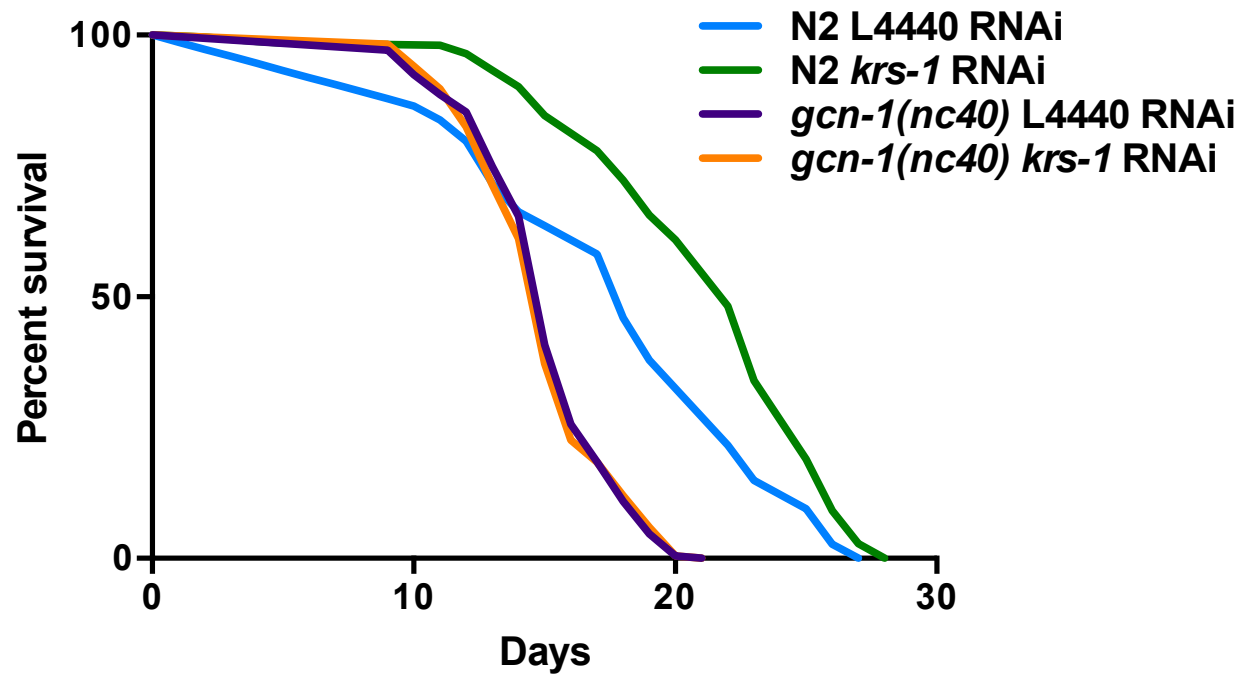

Supplement: 12915_2016_301_MOESM6_ESM.pdf [file 12915_2016_301_MOESM6_ESM.pdf]
